# Supplementary material for: Establishment of the epithelial-specific transcriptome of normal and malignant human breast cells based on MPSS and array expression data
Source: Springer Nature journal article supplement (doi:10.1186/bcr1604), 2006-10-02
Supplement: Additional file 2 [file bcr1604-s2.doc]

**Supplementary Table S1**. Pathology of individual primary breast tumours used for the malignant pool by MPSS and microarray analysis

| Cell ID | **in situ** | **Grad** | **Type** | **Size** | **Excised** | **Vascular Invasion** | **Lymph Node** | **ER** | **PR** | **Her-2** |
| --- | --- | --- | --- | --- | --- | --- | --- | --- | --- | --- |
| 489 | n/a | 3 | IDC | 25 | YES | + | n/a | + | n/a | - |
| 552 | n/a | 3 | IDC | 40 | YES | + | 8/9 | - | n/a | - |
| 593 | LCIS | 2 | ILC | 35 | YES | - | 1/9 | + | n/a | n/a |
| 695 | LICS | 1 | ILC | 42 | YES | - | 3/5 | + | - | n/a |
| 725 | DCIS, high grade | 3 | IDC | 35 | YES | + | 1/15 | + | n/a | n/a |
| 842 | LCIS,DCIS | 3 | IDC | n/a | n/a | + | 1/10 | + | + | - |
| 845 | DICS,high grade | 3 | IDC | 50 | YES | + | 2/9 | + | - | n/a |
| 896 | DCIS,high grade | n/a | n/a | 45 | NO | - | 0/2 | n/a | n/a | n/a |
| 983 | n/a | 3 | IDC | 15 | YES | + | n/a | - | - | + |
| 1000 | n/a | n/a | n/a | n/a | n/a | n/a | n/a | n/a | n/a | n/a |
| 1033 | n/a | 3 | IDC | 58 | YES | - | 1/15 | - | - | - |
| 1045 | DCIS | 2 | IDC | 50 | YES | - | 0/19 | - | n/a | - |
| 1052 | n/a | 3 | IDC | 35 | YES | - | 0/19 | - | - | n/a |
| 1062 | n/a | 2 | IDC | 20 | YES | + | 1/25 | + | - | - |
| 1063 | n/a | 3 | IDC | 45 | YES | + | n/a | + | + | + |
