# Supplementary material for: Establishment of the epithelial-specific transcriptome of normal and malignant human breast cells based on MPSS and array expression data
Source: Springer Nature journal article supplement (doi:10.1186/bcr1604), 2006-10-02
Supplement: Additional file 10 [file bcr1604-s10.doc]

**Univariate analysis of POSTN on 245 tumour tissue microarray.**

| Parameter |  | No. available | Not assessable | POSTN + | POSTN - | Statistical association |
| --- | --- | --- | --- | --- | --- | --- |
| Grade | 1 | 224 | 21 | 6 | 15 | p=0.06 |
|  | 2 |  |  | 6 | 57 | Chi-square test |
|  | 3 |  |  | 30 | 110 |  |
|  |  |  |  |  |  |  |
| LVI | + | 226 | 19 | 32 | 116 | p=0.1494 |
|  | - |  |  | 10 | 68 | Fisher’s exact test |
|  |  |  |  |  |  |  |
| LN mets | + | 221 | 24 | 29 | 113 | p=0.3719 |
|  | - |  |  | 12 | 67 | Fisher’s exact test |
|  |  |  |  |  |  |  |
| ER | + | 227 | 18 | 37 | 142 | p=0.1420 |
|  | - |  |  | 5 | 43 | Fisher’s exact test |
|  |  |  |  |  |  |  |
| PgR | + | 227 | 18 | 36 | 129 | p<0.05 |
|  | - |  |  | 6 | 56 | Fisher’s exact test |
|  |  |  |  |  |  |  |
| HER2 | + | 227 | 18 | 3 | 29 | p=0.2187 |
|  | - |  |  | 39 | 156 | Fisher’s exact test |
|  |  |  |  |  |  |  |
| EGFR | + | 228 | 17 | 4 | 18 | p>0.9999 |
|  | - |  |  | 38 | 168 | Fisher’s exact test |
|  |  |  |  |  |  |  |
| CK 14 | + | 226 | 19 | 1 | 20 | p=0.1368 |
|  | - |  |  | 41 | 164 | Fisher’s exact test |
|  |  |  |  |  |  |  |
| CK 5/6 | + | 218 | 27 | 1 | 24 | p=0.0544 |
|  | - |  |  | 39 | 154 | Fisher’s exact test |
|  |  |  |  |  |  |  |
| CK 17 | + | 225 | 20 | 2 | 25 | p=0.1819 |
|  | - |  |  | 39 | 159 | Fisher’s exact test |
|  |  |  |  |  |  |  |
| Basal markers | - | 226 | 19 | 3 | 35 | p=0.0695 |
|  | + |  |  | 39 | 149 | Fisher’s exact test |
|  |  |  |  |  |  |  |
| Nielsen groups | Basal | 218 | 27 | 3 | 27 | p=0.0771 |
|  | Luminal |  |  | 36 | 120 | Chi-square test |
|  | HER2 |  |  | 3 | 29 |  |
|  |  |  |  |  |  |  |
| P53 | + | 221 | 24 | 13 | 52 | p=0.7081 |
|  | - |  |  | 28 | 128 | Fisher’s exact test |
|  |  |  |  |  |  |  |
| Ki67(MIB-1) | <10% | 222 | 23 | 14 | 80 | p<0.05 |
|  | 10-30% |  |  | 25 | 71 | Chi-square test |
|  | >30% |  |  | 3 | 29 |  |
|  |  |  |  |  |  |  |
| CCND1 amp | Amp | 226 | 19 | 1 | 27 | p<0.05 |
|  | No amp |  |  | 41 | 157 | Fisher’s exact test |
|  |  |  |  |  |  |  |
| COMP | + |  |  | 14 | 18 | p<0.0005 |
|  | - |  |  | 26 | 167 |  |

LVI (lymph node invasion), LN met Lymph node metastases.
